# Supplementary material
Source: publisher site journal article supplement (https://www.dovepress.com/article/306317)

**Supplementary Files**

**Supplementary** **Table 1.** Protocol for the visual assessment of sleep for both actigraphy and Emfit.a

|  |  | **Parameters** | **Extraction process** |
| --- | --- | --- | --- |
| **Bed entry time** | **Actigraphy** | 1. A pronounced decrease in activity based on visual inspection of the actogram 2. Drop in ambient light to 0 μW/cm2 3. Bed entry time entered in the sleep diary | If (c) occurs within 10 minutes of (a) and (b), use (c) as Bed entry time.  If (c) is absent, or it occurs outside 10 minutes of (a) and (b), use (a) as the Bed entry time |
|  | **Emfit** | 1. The timing of the first movement detected by the bed sensor. | Use the timing of the first movement detected by the bed sensor as the bed entry time. |
| **Sleep start time** | **Actigraphy and Emfit** | The first immobile period:   1. At least 10 minutes after bedtime 2. No more than one epoch of movement. | Use the first immobile period that satisfies (a) and (b) as the sleep start time.  The same method is used for both devices |
| **Sleep end time** | **Actigraphy and Emfit** | The last immobile period:   1. At least 10 minutes before bed exit time. 2. No more than one epoch of movement | Use the last immobile period that satisfies (a) and (b) as the sleep end time.  The same method is used for both devices. |
| **Bed exit time** | **Actigraphy** | 1. A pronounced increase in activity 2. Increased ambient light > 0.1 μW/cm2 3. Bed exit time entered in the sleep diary | If (c) occurs within 10 minutes of (a) and (b), use (c) as Bed exit time.  If (c) is absent, or it occurs outside 10 minutes of (a) and (b), use (a) as the Bed exit time. |
|  | **Emfit** | 1. The timing of the last movement detected by the bed sensor. | Use the timing of the last movement detected by the bed sensor as the bed entry time. |

aAdapted from Chow et al.15

**Supplementary Table 2.** Agreement between Emfit bed sensor and actigraphy, stratified by age.

|  | **Inter-caclass correlation coefficient (95% CI)** | |
| --- | --- | --- |
| **Age** | **<18 years** | **>=18 years** |
| **Time in bed** | 0.99 (0.99 to 0.99) | 0.99 (0.99 to 0.99) |
| **Sleep start** | 0.99 (0.99 to 0.99) | 0.99 (0.98 to 0.99) |
| **Sleep end** | 0.99 (0.99 to 0.99) | 0.99 (0.99 to 0.99) |
| **Time out of bed** | 0.99 (0.99 to 0.99) | 0.99 (0.99 to 0.99) |
| **Rest interval duration** | 0.99 (0.99 to 0.99) | 0.99 (0.98 to 0.99) |
| **WASOa** | 0.32 (-0.01 to 0.55) | 0.68 (0.59 to 0.75) |

aWASO: Wake after sleep onset.

**Supplementary** **Table 3.** Agreement between Emfit bed sensor and actigraphy, stratified by co-sleep status.

|  | **Inter-caclass correlation coefficient (95% CI)** | |
| --- | --- | --- |
|  | **Co-sleep** | |
| **Age** | **Yes** | **No** |
| **Time in bed** | 0.99 (0.99 to 0.99) | 0.99 (0.99 to 0.99) |
| **Sleep start** | 0.99 (0.99 to 0.99) | 0.99 (0.98 to 0.99) |
| **Sleep end** | 0.99 (0.99 to 0.99) | 0.99 (0.99 to 0.99) |
| **Time out of bed** | 0.99 (0.99 to 0.99) | 0.99 (0.99 to 0.99) |
| **Rest interval duration** | 0.99 (0.99 to 0.99) | 0.99 (0.98 to 0.99) |
| **WASOa** | 0.74 (0.65 to 0.81) | 0.36 (0.14 to 0.53) |

aWASO: Wake after sleep onset.

**Supplementary Figure 1.** Q-Q plots for bed entry time, bed exit time, time asleep, time awake, duration in sleep, and wake after sleep onset (WASO).

**Caption:** The y axis represents the difference between the two devices (bed sensor minus actigraphy) in minutes.

**
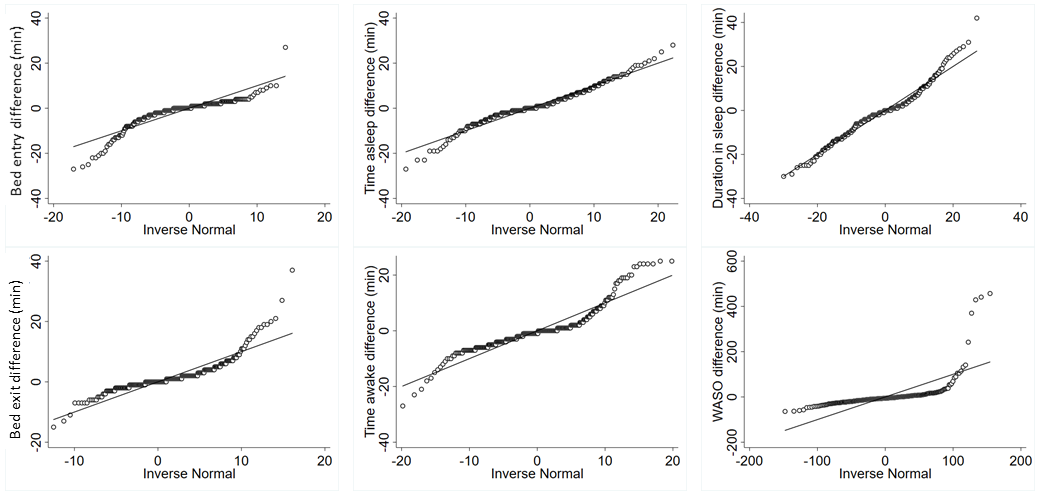
**

**Supplementary Figure 2.** Examples of discrepancies in activity data obtained with actigraphy and the bed sensor.

**Caption:**

Activity data for three different subjects, obtained with actigraphy (AC) and the bed sensor (BS). The yellow lines indicate the light intensity recorded by the actigraph. Blue arrowheads indicate bed entry time and bed exit time recorded on the sleep diary. Subjects 1 and 2: there is no activity recorded by the actigraph between times in and out of bed entered on the sleep diary, indicating that the subjects did not wear the watch during sleep. Subject 3: actigraphy starts detecting movement 1 hour and 10 minutes after the bedtime entered on the sleep diary, indicating that the subject was not wearing the actigraph when entering their bed. Upon further review, the bed sensor recorded a bed entry time closer to the subject's bed entry time reported in the diary. It is possible that the subject entered the bed, fell asleep, then woke up and put the actigraph on.


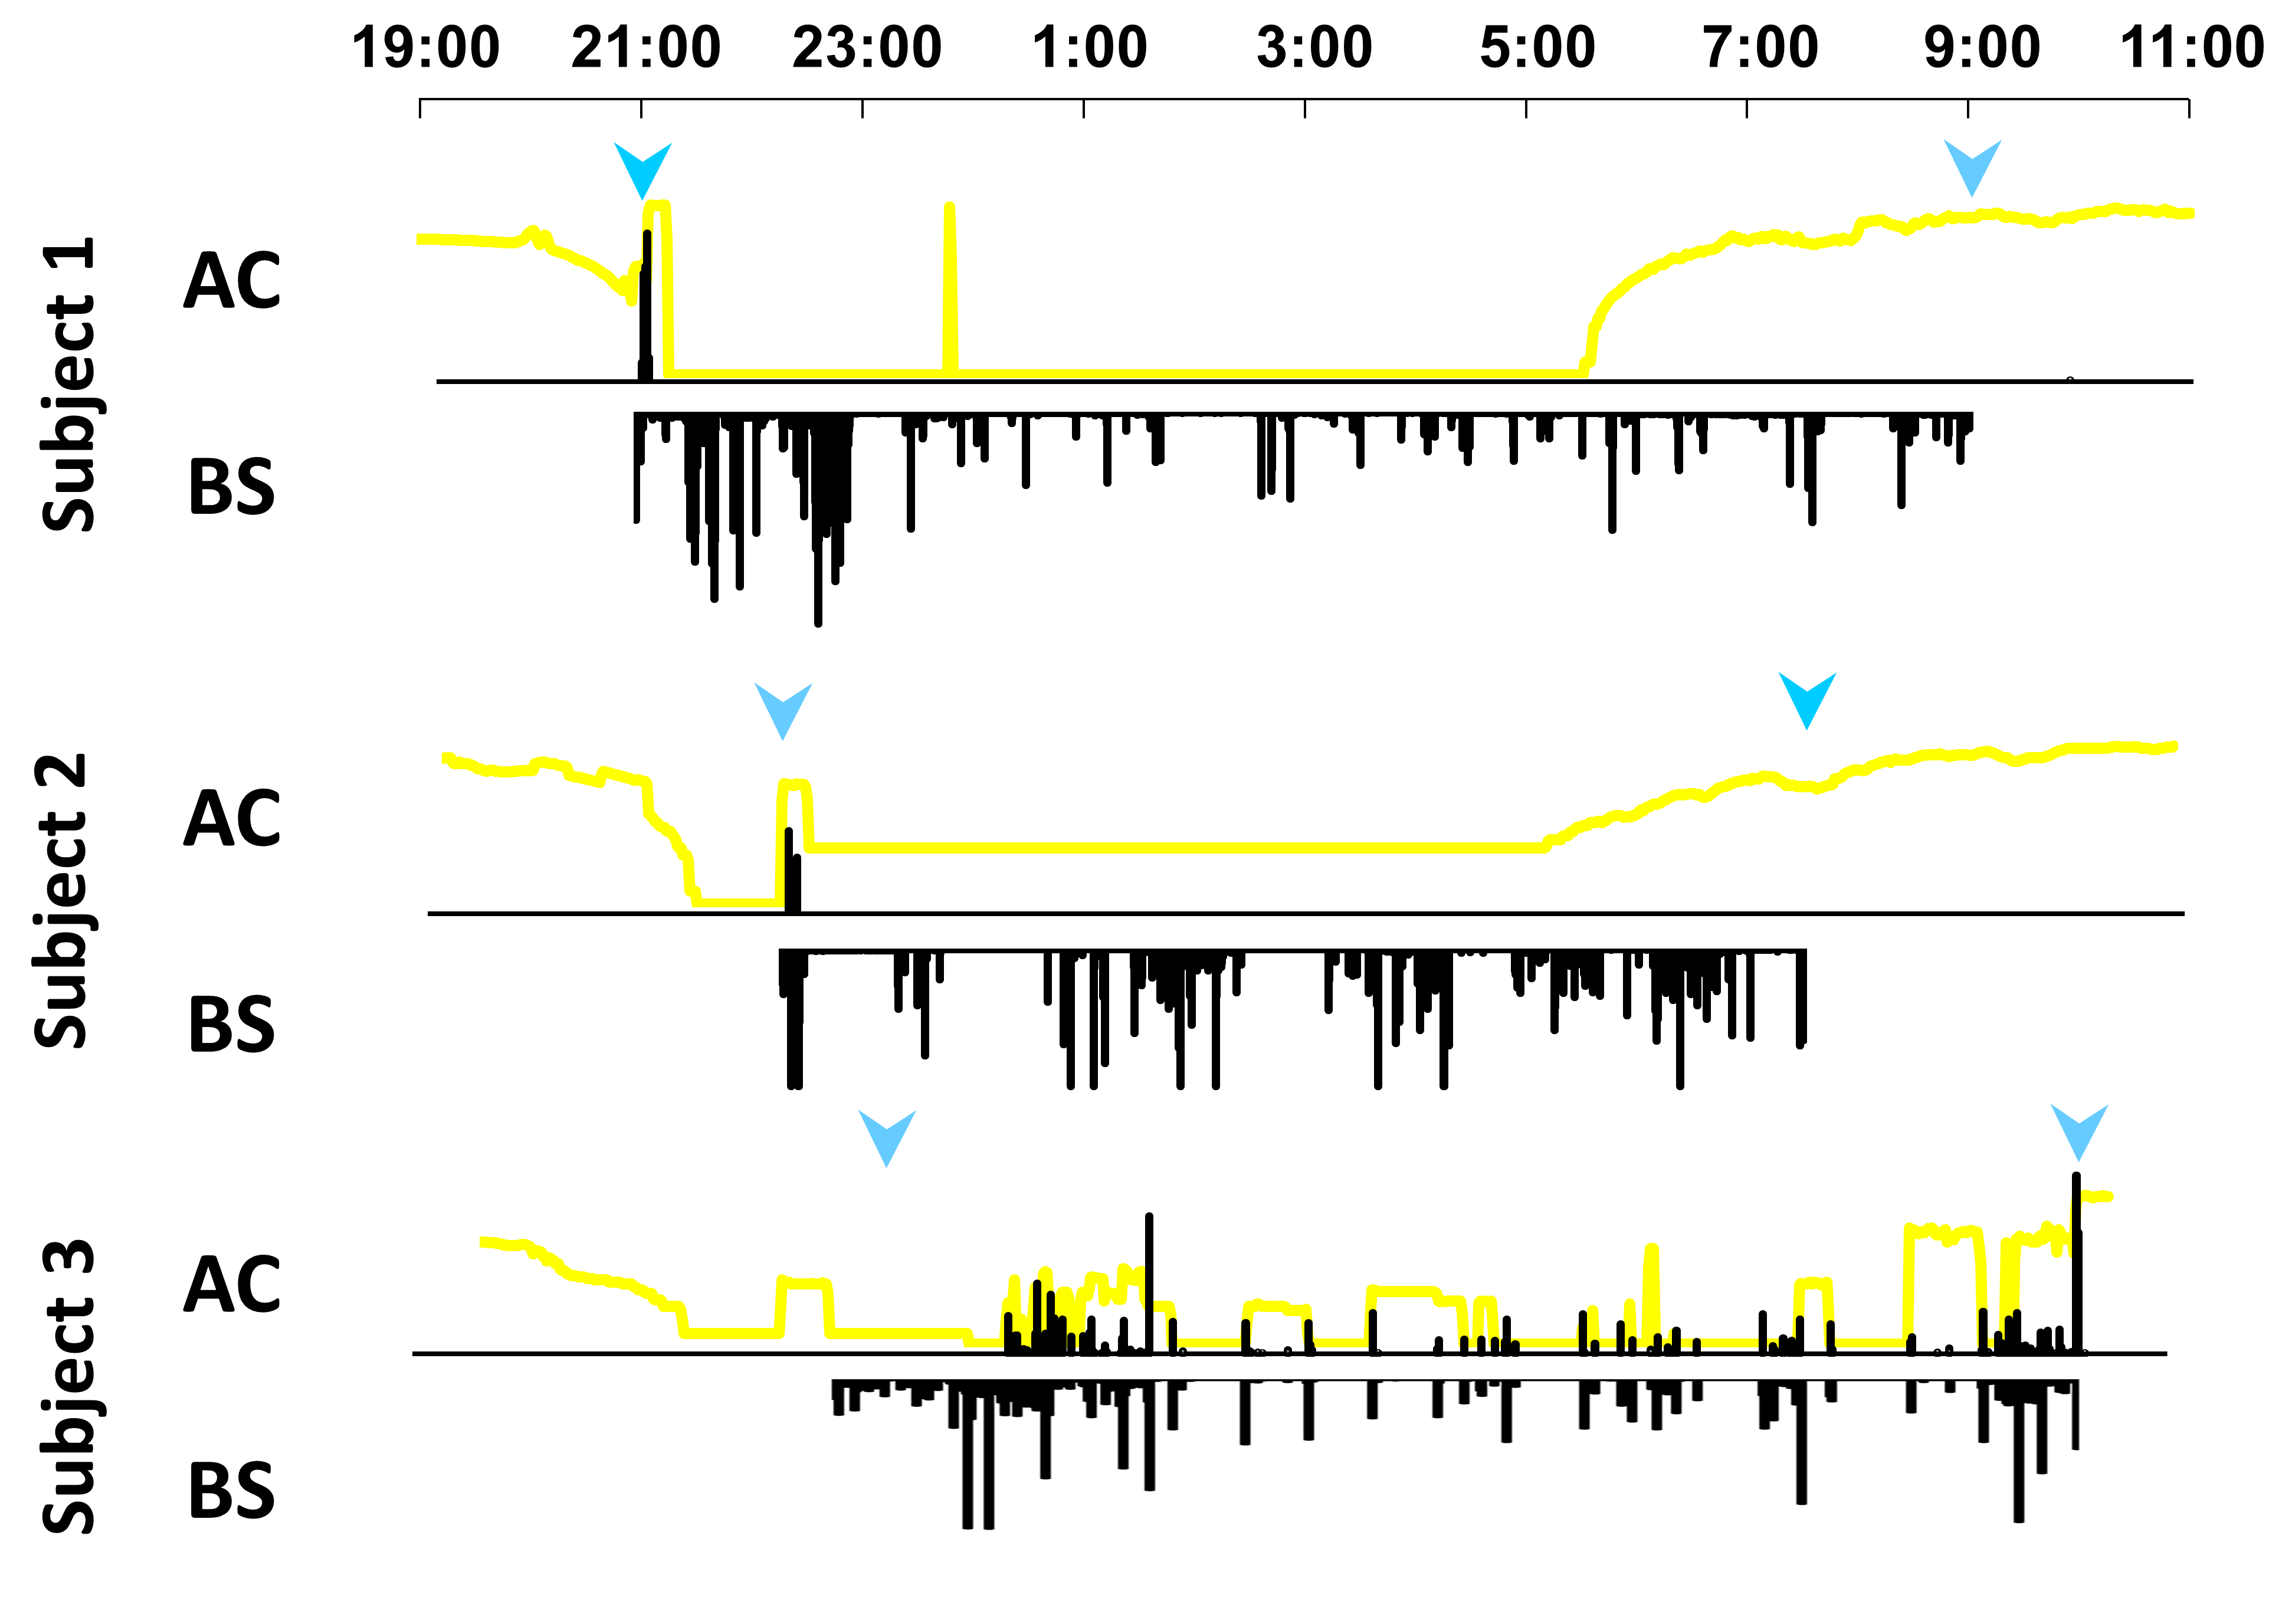

Supplement: Supplementary file 1 [file get_supplementary_file.php]
